# Supplementary material for: Death receptor 6 does not regulate axon degeneration and Schwann cell injury responses during Wallerian degeneration
Source: eLife. 2026 Mar 27;14:RP108389. doi: 10.7554/eLife.108389 (PMC13030889; doi:10.7554/eLife.108389)
Supplement: Appendix 1—figure 1—source data 1. [file elife-108389-app1-fig1-data1.xlsx]

## Sheet: Appendix 1-figure 1A
control	Tnfrsf21 ΔEx2-3/ΔEx2-3
1.36408	3.47e-05
0.831365	0.000153
0.866619	0
0.963489	2.01e-05
0.974444	2.65e-05

## Sheet: Appendix 1-figure 1C
control	Tnfrsf21 ΔEx2/ΔEx2
1.50029	0
0.815468	0.000101263
0.853275	3.05946e-05
0.853275	2.49359e-05
	2.73741e-05
