# Supplementary material for: Death receptor 6 does not regulate axon degeneration and Schwann cell injury responses during Wallerian degeneration
Source: eLife. 2026 Mar 27;14:RP108389. doi: 10.7554/eLife.108389 (PMC13030889; doi:10.7554/eLife.108389)
Supplement: Appendix 1—figure 2—source data 1. [file elife-108389-app1-fig2-data1.xlsx]

## Sheet: Appendix 1-figure2B
control	Tnfrsf21 ΔEx2-3/ΔEx2-3
0.003642	0.004682
0.003716	0.006648
0.003894	0.002324
0.006782	0.001401
0.001293	0.000743

## Sheet: Appendix 1-figure2D
control	Tnfrsf21 ΔEx2/ΔEx2
0.000208	0.000515
0.001212	0.001184
0.000339	0.000837
0.001268	0.000965
0.000102	0.00021
0.002815	0.003139
0.001591	0.002354
0.003358
0.000859
