# Supplementary material for: Death receptor 6 does not regulate axon degeneration and Schwann cell injury responses during Wallerian degeneration
Source: eLife. 2026 Mar 27;14:RP108389. doi: 10.7554/eLife.108389 (PMC13030889; doi:10.7554/eLife.108389)
Supplement: Appendix 1—figure 3—source data 1. [file elife-108389-app1-fig3-data1.xlsx]

## Sheet: Appendix 1-figure3A
left
	control	Tnfrsf21 ΔEx2-3/ΔEx2-3
3.60522	0.665766
3.12758	0.652458
4.96897	0.687645
3.96885	0.608151
2.06724	0.655242
1.59523	0.640617
3.44998	0.640154
3.11123	0.612627
4.31991	0.672978
2.24407	0.639866
3.0774	0.658748
4.20912	0.669059
3.24634	0.653324
3.90063	0.708546
3.47402	0.662553
3.32235	0.646179
4.65432	0.675075
3.46319	0.671392
1.63019	0.649888
4.35148	0.70993
3.51779	0.684816
2.5477	0.633032
2.95094	0.590481
3.15322	0.676395
1.92608	0.697581
2.94638	0.700744
3.07827	0.601769
3.38954	0.609319
3.50939	0.676536
2.71599	0.581241
2.88284	0.507726
4.92828	0.683917
3.46086	0.624582
2.93177	0.683301
3.72028	0.623569
4.09206	0.650055
4.43034	0.705181
4.34716	0.607431
1.37274	0.651086
3.16427	0.664709
4.29498	0.699813
4.58107	0.664376
4.66584	0.688793
1.61696	0.596434
4.15133	0.649856
2.54453	0.679757
3.02993	0.63216
3.89994	0.662227
3.54969	0.653125
4.56052	0.67144
4.23899	0.713423
3.32639	0.653026
3.93488	0.692379
4.32736	0.691853
1.77825	0.595488
2.88563	0.608922
5.13161	0.718551
3.01661	0.625231
4.60562	0.638249
3.88062	0.697536
3.16173	0.647442
2.17358	0.64873
3.28906	0.644964
4.75474	0.709554
1.43208	0.54909
3.20724	0.646581
4.24784	0.644754
2.31936	0.627712
2.90787	0.652262
2.79874	0.528679
2.94456	0.61797
3.29314	0.696666
3.28906	0.690923
4.66123	0.703509
1.49983	0.59792
3.54742	0.64513
3.33606	0.63024
3.63783	0.670684
3.26777	0.674339
3.85911	0.584164
2.85194	0.561864
4.10712	0.665937
4.66526	0.672235
4.29935	0.718196
3.40377	0.610923
4.4971	0.646815
1.45255	0.659709
1.73546	0.580986
3.50326	0.607068
2.9763	0.617231
2.12108	0.642501
3.72461	0.638766
3.30291	0.703395
3.1293	0.655501
4.17711	0.690521
3.24717	0.554657
3.41558	0.60301
3.1719	0.629041
2.34468	0.590772
3.50632	0.630805
3.33593	0.634256
1.73901	0.679272
2.41131	0.696755
3.44185	0.570196
3.04706	0.656138
2.48025	0.60578
4.67195	0.73158
2.72876	0.623458
3.13157	0.634748
4.18886	0.630116
3.83643	0.704637
2.12856	0.620002
3.4284	0.666478
3.93857	0.615714
2.94263	0.643295
3.79223	0.65718
2.86869	0.663869
5.07968	0.654545
3.16439	0.636444
1.74369	0.613953
1.85698	0.715912
3.69267	0.663018
1.94706	0.606634
2.58021	0.670328
2.89417	0.696338
2.91757	0.688653
4.12804	0.703579
5.40444	0.743742
3.36918	0.617629
2.45046	0.653387
3.90528	0.614485
2.64988	0.579901
3.49595	0.688368
3.99751	0.707227
3.22146	0.641116
3.34	0.658982
2.64269	0.621142
2.84489	0.643984
1.53287	0.638696
2.43488	0.712023
3.4276	0.649836
3.79438	0.656427
3.13764	0.627347
2.60538	0.683934
1.67366	0.637049
3.18837	0.602247
3.68309	0.679031
2.00215	0.675325
4.51385	0.706635
2.42031	0.59028
3.03274	0.657213
4.4727	0.692707
1.28799	0.594835
3.7562	0.621021
3.49517	0.659815
2.43822	0.63531
4.32053	0.686088
1.92176	0.625223
3.25338	0.601927
4.13396	0.686599
4.28323	0.702848
2.66931	0.731228
3.30809	0.648106
2.28745	0.649846
3.19007	0.642599
3.05152	0.673342
3.84564	0.630903
2.22232	0.700579
2.59282	0.60988
2.24545	0.699231
2.09378	0.659523
2.87721	0.650575
3.03095	0.61095
3.22568	0.65419
1.50963	0.66065
3.10978	0.657326
3.19603	0.574452
3.02915	0.642631
4.51024	0.685886
4.04283	0.673589
2.16278	0.589232
3.52153	0.734605
2.62099	0.616783
3.13677	0.67631
3.10453	0.661053
3.90668	0.661268
2.83627	0.731501
1.51861	0.620568
3.29986	0.585849
3.04884	0.723263
3.95373	0.705208
5.32996	0.740349
2.71277	0.626329
3.62953	0.745236
3.66458	0.714673
1.82299	0.683727
3.16783	0.664052
1.58005	0.65588
3.73733	0.70925
4.56835	0.664142
3.71177	0.710669
3.10993	0.612046
2.36624	0.586663
2.48328	0.667429
4.38241	0.679089
3.06081	0.581585
2.65281	0.652431
3.46052	0.590305
1.84397	0.620793
4.8515	0.711535
3.14341	0.703196
1.72667	0.582761
2.17448	0.688121
2.89328	0.680625
2.76172	0.624915
2.69813	0.579695
2.27481	0.661945
3.0653	0.67501
3.33647	0.648784
3.2367	0.647516
3.78237	0.645363
2.8092	0.627135
2.90848	0.685246
3.74282	0.700118
3.82943	0.653183
3.30077	0.679406
1.25544	0.606698
1.65663	0.511693
2.99805	0.671696
3.34966	0.609202
3.21963	0.602368
3.19558	0.647847
2.52182	0.59225
1.91147	0.606905
3.17568	0.664853
3.2435	0.620699
2.23817	0.569774
3.16438	0.660972
2.32157	0.656237
2.10363	0.654072
2.92171	0.669676
3.79328	0.694969
2.20093	0.665616
3.90989	0.654687
3.28822	0.668068
3.03822	0.669314
2.71239	0.641901
1.91147	0.669761
3.64132	0.651298
1.95565	0.619043
2.53164	0.636242
2.54683	0.670507
2.89518	0.669534
1.9057	0.695847
3.3513	0.670073
1.81384	0.550636
2.21217	0.686905
2.30489	0.624474
2.61726	0.618625
2.89709	0.689451
2.76571	0.634102
3.3141	0.578902
2.28448	0.585231
3.72363	0.674883
3.90989	0.656873
2.44752	0.665952
3.14429	0.682269
2.71848	0.67468
3.93588	0.673558
3.08859	0.619871
4.01215	0.640825
2.60777	0.64146
3.14166	0.687883
2.27723	0.549889
2.66318	0.668023
2.38017	0.645654
1.93155	0.656875
2.12837	0.650428
2.77764	0.718355
3.39216	0.638166
2.98976	0.641782
1.79244	0.65234
2.39632	0.653356
2.97776	0.655995
4.13659	0.665441
3.12407	0.582359
2.89137	0.541424
4.09912	0.677378
2.37321	0.707107
1.28365	0.537224
2.59293	0.64627
2.78655	0.650186
2.38364	0.616232
3.75972	0.652098
2.52291	0.64831
2.51087	0.684028
2.5587	0.690592
2.97405	0.722227
2.55223	0.626755
2.21714	0.66239
1.87509	0.537418
3.00356	0.598176
2.55007	0.56028
3.8531	0.660404
0.884618	0.537232
2.25778	0.59912
3.11612	0.596443
2.24677	0.471347
1.65163	0.557261
3.28403	0.55686
3.33399	0.603172
2.18711	0.517113
3.50797	0.665822
2.59506	0.535966
2.36507	0.638844
3.2401	0.598907
1.96549	0.605977
2.85975	0.530705
2.08785	0.605428
2.38364	0.65611
3.24265	0.638031
3.62388	0.613613
2.17321	0.521763
3.64586	0.647109
2.38133	0.505872
2.56408	0.60008
3.49301	0.652698
2.71036	0.599982
2.81704	0.698904
4.9588	0.689411
2.04518	0.587234
3.02913	0.62628
3.75165	0.624248
2.2529	0.519471
2.85397	0.575923
1.35467	0.535097
2.42376	0.605976
1.78937	0.494811
3.31991	0.667186
3.96031	0.660633
4.21053	0.662346
2.46211	0.519047
3.34389	0.644809
4.24443	0.686718
3.21963	0.595965
2.78754	0.488569
2.98884	0.600653
3.3824	0.643845
3.31742	0.596368
3.39866	0.607305
2.83265	0.546953
3.48116	0.649484
2.36157	0.616113
1.96549	0.615231
3.02458	0.572146
2.75272	0.631217
3.82295	0.631932
2.81899	0.570083
1.53759	0.495261
1.9057	0.579258
1.67153	0.484033
3.78164	0.605542
3.16873	0.557699
3.11081	0.595366
2.48883	0.549535
2.18585	0.588662
2.84817	0.573788
2.20967	0.587724
1.61963	0.593575
2.34166	0.630242
2.69609	0.540079
3.36443	0.640041
4.05858	0.682597
3.50483	0.64076
2.64866	0.605776
2.15794	0.544893
1.42215	0.4818
2.53924	0.564856
4.05722	0.671264
2.29651	0.617721
2.76571	0.654822
2.38248	0.540784
3.05179	0.605208
3.18348	0.609828
2.62882	0.582719
2.70323	0.637573
1.93155	0.476795
1.56424	0.595273
2.48993	0.595257
1.89846	0.595698
3.09572	0.601156
1.83047	0.576876
3.99011	0.693555
2.54466	0.57916
3.44296	0.627372
4.54112	0.703358
2.40207	0.610082
3.08412	0.60879
3.01911	0.583137
2.42376	0.544237
1.4754	0.556164
2.2905	0.548703
3.62236	0.646255
3.12319	0.584494
2.37437	0.577162
2.48106	0.545263
3.22732	0.573869
2.18963	0.470984
1.71868	0.627327
2.48217	0.648062
2.38941	0.552327
1.82142	0.482112
2.77168	0.655023
1.95142	0.591202
2.33222	0.584905
2.71442	0.587016
1.98224	0.577485
2.24432	0.500617
2.45987	0.550816
3.47562	0.677396
2.13225	0.621043
3.43414	0.687926
2.66835	0.555826
2.2283	0.599375
2.56623	0.551006
2.09049	0.732734
1.85885	0.646529
3.16438	0.593177
3.97697	0.650522
2.98976	0.7251
2.08653	0.555512
2.89328	0.642211
2.28929	0.704335
2.78259	0.59769
4.06604	0.636027
2.73162	0.48484
2.53164	0.540091
2.00573	0.544746
2.9283	0.712275
2.17448	0.530475
4.49232	0.722925
2.97498	0.611066
1.82444	0.661096
2.34283	0.646363
2.50538	0.593552
2.44188	0.672563
1.95706	0.576108
1.98779	0.498611
3.03912	0.60652
2.58335	0.632403
2.52401	0.624932
2.31919	0.63052
2.78457	0.709379
1.99609	0.574313
2.53055	0.617745
2.51854	0.52683
2.47773	0.589193
2.11147	0.553779
1.4958	0.502794
2.9283	0.497845
1.77079	0.687738
2.68585	0.666356
2.26388	0.535924
3.09661	0.566232
3.02276	0.582944
3.04998	0.640707
2.31086	0.701518
2.28568	0.594864
2.47884	0.521362
3.61322	0.664566
2.42035	0.534774
2.49436	0.556848
2.27965	0.532309
2.25045	0.543598
1.56248	0.591308
2.38595	0.543348
2.42944	0.664704
2.24186	0.60863
2.06529	0.60423
3.68495	0.64983
3.40514	0.583814
2.56301	0.586864
2.96478	0.621976
2.25045	0.541253
3.34637	0.645087
1.90714	0.58722
2.70323	0.614724
3.88515	0.673853
3.43414	0.589122
3.27058	0.63931
3.59946	0.642905
2.83167	0.564995
2.07461	0.608393
3.12848	0.53573
3.47879	0.62532
2.94426	0.617672
2.12448	0.638011
1.91003	0.532458
3.35048	0.620244
2.97035	0.563221
3.9434		0.688
3.08696		0.648418
3.02825		0.680205
3.04438		0.545042
2.37036		0.663145
3.97636		0.733712
2.63548		0.628384
3.38529		0.662401
3.1359		0.612457
1.9679		0.572809
4.25265		0.67077
2.7397		0.618024
2.21128		0.558512
3.45526		0.706383
4.84512		0.674171
1.72802		0.60158
4.13988		0.633401
2.08858		0.589736
2.99303		0.684907
2.84871		0.684754
3.16869		0.598008
4.38985		0.691382
3.3163		0.608714
3.67865		0.648996
3.71397		0.668957
3.54922		0.614215
3.10803		0.638231
3.51689		0.713249
1.94846		0.612098
3.7872		0.653698
2.76145		0.63445
4.826		0.694842
2.58757		0.697126
1.63253		0.68973
1.66225		0.594571
1.54876		0.611593
3.04706		0.67325
4.46905		0.633561
1.94985		0.657889
1.84376		0.656306
4.16999		0.608648
2.36576		0.6799
2.30403		0.700147
3.22821		0.646581
4.40716		0.672797
1.75767		0.68486
4.69807		0.671893
3.75982		0.718247
2.70675		0.630353
3.87171		0.676502
1.61579		0.585749
1.64415		0.617835
3.22315		0.645709
3.77281		0.658784
2.88476		0.594089
5.1783		0.697035
6.09188		0.766044
2.59072		0.638381
2.79279		0.672158
3.22568		0.658103
1.59887		0.633805
3.60246		0.659368
2.82763		0.616555
1.66061		0.631336
5.91981		0.716082
3.01024		0.669936
4.22635		0.667073
3.22062		0.568814
2.79084		0.707601
3.56985		0.69591
3.86679		0.677501
2.78694		0.648838
3.11415		0.629182
3.19178		0.658456
2.8151		0.759474
5.22327		0.68226
1.77614		0.612109
3.48114		0.665671
6.89161		0.747657
3.17469		0.602712
3.86328		0.668782
3.42045		0.653872
4.58677		0.689167
3.47879		0.607495
5.27817		0.71586
2.63341		0.612013
3.73805		0.668186
4.69923		0.696467
4.74931		0.667696
3.49517		0.649571
3.7169		0.594861
2.31698		0.559762
3.07814		0.641884
3.0533		0.613492
3.89413		0.635609
4.08699		0.646173
4.18236		0.676749
4.4532		0.708956
3.24669		0.591349
3.63627		0.625974
4.15693		0.632276
1.5766		0.610289
2.0278		0.596601
3.53771		0.597466
3.05508		0.615814
3.62728		0.646645
4.09895		0.642927
1.409		0.529266
2.9417		0.620895
3.58505		0.643526
3.15751		0.65071
3.47879		0.609774
3.53386		0.677846
2.13621		0.645113
3.42125		0.598888
4.6057		0.65183
2.40227		0.721886
2.71277		0.655589
3.17555		0.660015
2.43599		0.589169
4.15103		0.686555
3.53155		0.62909
5.15567		0.700473
3.74387		0.662806
3.63103		0.638329
2.91197		0.638672
3.2383		0.555721
2.73573		0.561522
2.55265		0.577994
2.43822		0.66267
2.32869		0.637657
4.18886		0.711476
2.16027		0.61466
5.16094		0.660705
3.59414		0.63414
5.65093		0.70287
1.73901		0.597576
3.62503		0.615276
3.95579		0.594289
2.35655		0.489792
3.13417		0.604883
3.90528		0.570905
4.39418		0.687992
3.62278		0.570342
2.20512		0.617049
3.2147		0.625772
3.44501		0.612618
2.7506		0.607425
3.55917		0.644898
2.72876		0.638406
2.35077		0.582436
4.40962		0.715154
4.13594		0.620591
3.16267		0.649676
3.67791		0.585934
4.51205		0.710149
2.78303		0.612641
1.99399		0.606235
3.76415		0.676625
4.27306		0.670865
2.00622		0.580497
4.01516		0.657656
2.69264		0.64431
2.50859		0.533699
1.85845		0.499312
2.91384		0.691872
1.40319		0.538792
3.32122		0.638466
3.28085		0.582574
2.75455		0.577972
3.47645		0.668105
4.90315		0.686232
3.00481		0.642281
3.63477		0.625868
4.99546		0.71158
2.63444		0.606315
2.2803		0.497727
3.84917		0.589749
1.63918		0.628147
2.59387		0.542894
1.11848		0.513577
2.75159		0.534084
3.12287		0.640985
3.93166		0.6799
3.66829		0.617892
4.21281		0.624599
4.19081		0.646817
2.48791		0.569887
2.41919		0.492782
3.38047		0.595432
4.683		0.710552
3.11851		0.547585
3.59339		0.606822
4.31486		0.695913
4.19016		0.65461
4.20312		0.652063
3.63702		0.622749
4.41456		0.639108
2.33917		0.584959
3.91919		0.643063
3.07725		0.634243
3.14802		0.623619
2.50534		0.63925
3.76199		0.671938
3.55764		0.623908
3.78792		0.598319
2.22965		0.658005
3.15148		0.634404
3.64822		0.6519
2.47146		0.674145
2.87248		0.666203
4.35626		0.641776
3.66606		0.670827
2.6158		0.720401
2.51833		0.60831
2.70272		0.653058
4.35689		0.636074
4.30224		0.657072
3.4694		0.632999
2.75159		0.514186
3.05864		0.617077
2.72078		0.599252
4.13462		0.676582
1.84523		0.562709
3.32286		0.655184
2.36346		0.582189
4.17846		0.665447
3.56985		0.669258
3.76415		0.702271
4.09364		0.679036
4.51446		0.713854
3.15493		0.64396
3.54001		0.628593
2.27911		0.629105
5.34829		0.669352
2.51184		0.560757
2.85634		0.626552
3.66977		0.653542
2.4901		0.549606
2.42705		0.54894
1.70425		0.649206
3.64971		0.693915
3.70297		0.672577
2.8122		0.597043
3.48426		0.573551
2.69163		0.672298
3.02825		0.636317
4.12079		0.664189
2.57915		0.652788
2.1853		0.674654
2.21742		0.568917
4.2424		0.658201
3.41727		0.640654
4.20247		0.69929
3.84422		0.634867
2.96747		0.705041
3.94202		0.631197
4.04216		0.643474
2.84106		0.60645
3.36595		0.579627
2.56223		0.62049
2.65399		0.612668
3.0021		0.609323
2.86869		0.696039
2.92873		0.630818
3.86468		0.661679
4.6175		0.688104
3.7169		0.649721
3.62878		0.609219
3.0417		0.586561
3.16783		0.616585
2.67745		0.567047
2.82089		0.614291
1.92034		0.659888
2.64166		0.644786
3.48036		0.637892
2.48791		0.618275
3.43157		0.657633
2.92315		0.659408
3.29409		0.638795
2.72976		0.600202
3.70297		0.666388
3.47723		0.621077
1.95821		0.525496
3.94685		0.662364
3.44027		0.600519
2.76637		0.635945
4.18106		0.603245
2.6012		0.618398
5.12073		0.74202
3.3163		0.665243
2.70976		0.634432
2.87437		0.710388
2.64063		0.560962
3.51457		0.66652
2.94078		0.65884
4.38489		0.702649
2.87626		0.592612
2.18405		0.627819
2.79182		0.64608
2.34583		0.598344
3.45076		0.626773
2.67817		0.608008
4.90754		0.723079
2.37426		0.590919
2.02526		0.610776
2.18958		0.584484
1.93025		0.493986
3.09653		0.600977
3.40535		0.590577
2.02526		0.646132
2.70906		0.595487
4.05185		0.69676
2.26312		0.572274
3.84168		0.65973
3.22644		0.717544
2.79201		0.597585
1.79926		0.624329
3.70075		0.670282
2.48475		0.574197
2.81309		0.588364
1.81115		0.655267
2.69714		0.698525
2.86321		0.597796
2.23808		0.606909
2.79586		0.641508
2.33206		0.684664
3.09566		0.569068
1.75699		0.671551
2.42903		0.638942
2.26431		0.707107
3.35612		0.596569
3.16682		0.5961
2.64793		0.678368
2.43455		0.614043
1.8067		0.621709
2.57703		0.575031
1.90646		0.681421
2.71005		0.637603
3.2579		0.699281
3.79812		0.672745
3.94238		0.649577
2.04505		0.611686
2.7949		0.552354
2.90047		0.62684
2.55926		0.667031
2.81022		0.617643
2.57807		0.676764
2.3561		0.645445
1.85797		0.667301
4.01524		0.681332
2.72979		0.68443
3.76118		0.694313
2.52015		0.604068
2.82546		0.665648
2.68717		0.638417
3.36011		0.671851
2.74254		0.609282
2.54242		0.687137
2.64995		0.677457
2.41907		0.657286
1.898		0.489883
1.7401		0.587508
2.51909		0.607667
1.85508		0.719272
2.04898		0.625613
3.79882		0.682775
3.34731		0.685136
3.16682		0.679646
2.18712		0.593208
1.6916		0.536322
3.34249		0.706428
2.88656		0.649326
2.54875		0.686964
2.40013		0.719623
1.43955		0.657458
2.30892		0.607799
3.05288		0.714975
3.22227		0.666782
0.838629		0.587917
2.06594		0.725116
2.14374		0.651293
2.72979		0.637528
3.5315		0.71265
1.9565		0.542572
3.87023		0.684538
2.70013		0.66401
2.6337		0.634818
3.54061		0.67578
2.39565		0.628994
2.75231		0.584222
4.34469		0.690702
1.97289		0.630286
2.7347		0.651686
3.39903		0.618859
2.24287		0.510742
3.09826		0.691152
2.08663		0.625778
1.84347		0.681982
2.61529		0.670242
2.9844		0.603105
2.49876		0.64322
3.873		0.664057
2.54664		0.601666
1.5387		0.578225
3.37208		0.603775
3.89512		0.688074
2.20546		0.51827
1.67245		0.528684
2.85852		0.569485
3.66577		0.616762
3.50096		0.687013
2.12866		0.555511
1.00998		0.539825
2.49768		0.566877
2.24407		0.549188
2.0776		0.570416
2.76302		0.631479
2.93269		0.539795
2.62348		0.642043
2.06724		0.616992
2.58327		0.647039
2.89306		0.673395
1.87666		0.680644
2.75231		0.551805
2.30077		0.650659
2.37087		0.656538
1.13748		0.539177
3.12586		0.562017
1.82738		0.568434
2.8444		0.65017
2.51589		0.482324
1.97697		0.498462
2.44116		0.635786
2.66107		0.650197
2.56659		0.644055
3.64299		0.661747
2.74548		0.587119
3.11296		0.676589
2.59261		0.65922
2.32514		0.538007
1.90082		0.524755
2.41796		0.653241
2.62757		0.623502
1.6547		0.585638
3.28498		0.569564
2.14624		0.532048
1.71524		0.532445
2.18712		0.610066
2.70112		0.616382
1.75546		0.572713
3.03347		0.616409
3.22394		0.605817
2.28438		0.645885
1.87237		0.530305
2.19447		0.609323
2.44665		0.593822
3.18288		0.663606
2.16368		0.53278
3.17866		0.613453
2.55296		0.637944
1.99454		0.551872
3.00144		0.623888
2.44445		0.627015
3.02727		0.638812
2.95003		0.663513
2.84723		0.525406
3.23392		0.632845
1.83764		0.570292
1.29008		0.500808
1.97561		0.458915
2.68217		0.688355
2.44555		0.634166
2.22726		0.553595
2.61118		0.632456
3.02017		0.667343
2.03847		0.593277
3.09479		0.662471
1.86086		0.559695
2.02128		0.584958
1.48544		0.593452
2.61426		0.555389
3.63045		0.676584
2.54453		0.609161
2.13118		0.581025
4.05251		0.649473
3.08437		0.588642
2.27731		0.565662
3.4531		0.569415
2.15747		0.577018
1.38442		0.489651
2.45869		0.600267
4.77221		0.678481
2.40906		0.524532
2.04505		0.580966
2.22243		0.553222
2.41129		0.561911
2.31357		0.570524
1.63019		0.581675
2.56764		0.609925
right
control	Tnfrsf21 ΔEx2-3/ΔEx2-3
0.647576	0.652458
0.6584	0.621968
0.645448	0.637186
0.594278	0.639179
0.599211	0.596842

## Sheet: Appendix 1-figure3B
top
	control						Tnfrsf21 ΔEx2-3/ΔEx2-3
0-1	3.63036	3.87409	5.31732	5.86371	6.27208	6.67667	4.91924	4.64505	4.04889	4.30966	6.11028	5.87302
1-2	28.7954	30.7506	37.5643	31.458	38.9576	39.7599	32.746	31.2007	26.738	39.9042	40.9091	42.3809
2-3	32.6733	37.1267	42.9674	42.2345	44.6996	41.5604	35.8297	37.7739	42.4752	43.5754	40.9091	39.8413
3-4	26.7327	22.7603	12.8645	17.5911	9.80565	11.853	20.8517	21.823	22.0015	11.0934	11.4009	11.4286
4-5	7.92079	4.92333	1.28645	2.45642	0.265018	0.150038	4.84581	4.46976	4.27808	1.11732	0.670641	0.47619
>5	0.247525	0.564972	0	0.396197	0	0	0.807636	0.087642	0.458365	0	0	0
bottom
	control						Tnfrsf21 ΔEx2-3/ΔEx2-3
0-1	0	0	0	0	0	0	0	0	0	0	0	0
1-2	4.57516	6.48968	9.5912	4.01929	8.42975	7.62053	5.45455	4.25868	3.10078	6	4.21394	3.47107
2-3	24.3464	29.4985	28.6164	21.2219	23.4711	24.1058	22.1212	20.8202	20.4651	29.1667	24.4733	24.9587
3-4	19.7712	24.9262	33.805	26.8489	35.8678	31.4152	21.8182	20.8202	25.5814	38	32.577	35.5372
4-5	26.4706	24.1888	19.8113	28.6174	22.6446	26.5941	25.6061	26.6562	28.3721	20.8333	29.1734	22.6446
5-6	15.6863	10.9145	7.07547	16.2379	8.26446	10.2644	18.3333	20.0315	16.5892	5.5	8.75203	11.5702
6-7	8.98693	3.68732	1.10063	3.05466	1.32231	0	5.60606	6.46688	5.73643	0.5	0.810373	1.81818
>7	0.163399	0.294985	0	0	0	0	1.06061	0.946372	0.155039	0	0	0

## Sheet: Appendix 1-figure3C
left
	control	Tnfrsf21 ΔEx2/ΔEx2
4.05648	0.650674
1.22623	0.581822
1.17986	0.579567
2.9184	0.545599
4.37168	0.597484
4.382	0.61714
2.87068	0.580163
1.80324	0.512945
2.00552	0.670267
2.78805	0.644232
1.86978	0.623978
4.64224	0.600604
3.00098	0.60908
3.02127	0.713574
4.03415	0.603175
2.1537	0.550855
4.11951	0.614989
2.6802	0.535997
4.20946	0.629536
4.4625	0.61679
3.37119	0.524141
4.36438	0.614983
4.32402	0.65362
4.38018	0.61845
3.15631	0.610301
1.96234	0.677669
2.5083	0.636795
3.91241	0.663918
2.54424	0.567826
3.0833	0.622397
2.87071	0.563752
3.99548	0.622679
3.56828	0.614276
4.43755	0.675843
4.00616	0.651993
4.99579	0.723389
4.62957	0.691639
4.30684	0.645815
5.03307	0.703116
4.6692	0.705682
3.9491	0.670505
3.0203	0.663823
3.01765	0.661365
2.14441	0.696078
3.15945	0.688567
1.60945	0.583601
3.37284	0.56822
3.39415	0.715617
2.83891	0.60667
3.76351	0.64493
1.49236	0.704158
2.28313	0.663502
5.07955	0.672405
4.19502	0.63729
1.78863	0.726466
3.5284	0.619438
3.1246	0.620683
2.95686	0.672651
3.07289	0.590116
2.77997	0.583224
3.15183	0.660772
3.96462	0.770057
1.86035	0.719712
1.82703	0.697139
3.51247	0.632127
2.17286	0.633172
3.26666	0.602721
2.75876	0.694783
2.98204	0.645982
2.96588	0.655336
2.44904	0.719051
2.85017	0.625141
4.05387	0.694851
3.36333	0.540684
2.1593	0.745926
4.17557	0.700398
5.48856	0.721508
3.75011	0.676065
3.23784	0.654582
2.75324	0.708727
2.91946	0.684386
4.60741	0.667011
2.69754	0.592433
3.33749	0.663344
4.92915	0.674711
3.9729	0.685199
2.1279	0.732541
4.80659	0.681941
3.44586	0.606834
3.56141	0.727481
4.00762	0.617853
4.92267	0.677689
3.83787	0.661543
4.31176	0.682426
4.91833	0.684458
5.11322	0.724165
5.2798	0.675627
4.08202	0.724635
2.2186	0.621001
4.1551	0.649831
4.58233	0.6509
3.83219	0.675189
3.90226	0.634406
1.97885	0.629304
3.20641	0.547383
2.74677	0.640721
3.63437	0.684683
2.44812	0.674146
4.15163	0.664802
2.72444	0.663743
3.35619	0.663958
3.47671	0.609848
2.90014	0.611745
3.49729	0.617456
2.68811	0.609162
2.84931	0.697362
2.63622	0.733821
4.9502	0.666731
4.96842	0.684221
1.35587	0.655602
2.16968	0.661298
3.28983	0.697084
5.18506	0.679842
3.64896	0.69434
4.73516	0.649615
5.67375	0.712043
4.71655	0.64397
5.39016	0.679251
4.24203	0.658677
2.86421	0.634436
1.76531	0.671337
5.5633	0.712866
3.6435	0.67782
3.87243	0.662483
2.76002	0.638012
4.9216	0.675498
2.50186	0.657982
5.27881	0.6726
4.9459	0.650678
3.23703	0.632295
4.38528	0.62546
5.98091	0.731828
4.05323	0.692174
5.61049	0.691877
5.57286	0.720069
4.36885	0.676072
2.34809	0.660144
4.20609	0.649643
3.55019	0.59756
5.79774	0.708033
4.21682	0.675147
4.01226	0.625255
4.95126	0.684117
4.79772	0.668465
3.95544	0.576044
4.67398	0.67417
3.81769	0.633522
2.97548	0.679744
3.26324	0.695799
2.67174	0.744277
4.50333	0.715712
2.56389	0.754446
2.84741	0.680675
2.91855	0.761425
3.70725	0.660998
2.86605	0.700996
5.87575	0.723654
3.2296	0.721914
3.26813	0.724289
4.31732	0.673055
3.47434	0.648991
6.24237	0.762426
3.10771	0.745859
2.60409	0.675237
3.71084	0.669159
2.98799	0.661253
4.1883	0.666498
2.88458	0.717518
5.04769	0.68572
2.47078	0.655389
2.96742	0.649123
4.90912	0.684873
5.4074	0.740212
4.97541	0.716893
2.08107	0.692565
3.40308	0.70589
2.91307	0.708554
1.61892	0.714034
4.77769	0.676464
4.44439	0.628535
3.06195	0.658162
4.94534	0.711852
5.08344	0.700815
3.09655	0.685367
2.35826	0.646867
5.03554	0.675071
4.0892	0.644071
3.53966	0.684285
4.62184	0.702134
3.12396	0.7265
2.2849	0.54747
3.89963	0.658826
2.3587	0.580055
3.14058	0.603052
4.0808	0.588199
2.8369	0.602822
4.11867	0.64432
2.3621	0.588859
4.68265	0.644678
2.80559	0.610739
1.79988	0.682454
2.77005	0.537288
3.927	0.600375
2.36323	0.623959
3.21222	0.585927
4.20488	0.689578
4.02731	0.644196
4.2271	0.650958
2.56323	0.59473
3.33651	0.69308
3.30506	0.63894
3.06813	0.677855
4.16329	0.67351
4.50132	0.656602
3.52307	0.633166
2.67175	0.657463
3.08536	0.548537
4.62186	0.6742
2.43058	0.631829
3.88273	0.590612
2.91856	0.593075
3.88753	0.619301
3.35898	0.575002
2.23297	0.69282
2.25788	0.57535
4.82872	0.665797
3.43736	0.585683
4.38953	0.656198
2.903	0.705659
2.61329	0.692022
2.72799	0.68956
3.24935	0.599704
2.08747	0.577703
2.65976	0.614924
2.58357	0.599188
3.91007	0.63272
3.93993	0.629097
2.87442	0.663137
3.20145	0.673548
2.72994	0.642216
2.4869	0.719451
2.88735	0.60533
2.61532	0.706557
2.85861	0.654776
3.27871	0.630211
3.03574	0.716806
3.5741	0.698423
2.7005	0.705947
4.45815	0.642825
3.29492	0.641782
3.96552	0.688855
3.06543	0.654018
3.36609	0.75687
2.54722	0.648746
3.48123	0.608506
3.29411	0.663078
3.34784	0.646754
2.48368	0.68457
2.89012	0.593799
3.71013	0.671711
2.63662	0.614584
3.21223	0.659536
3.14689	0.725179
3.49802	0.676709
2.77445	0.75709
4.78716	0.665208
2.72798	0.628553
4.58306	0.673486
5.31851	0.709516
4.25017	0.639954
3.17134	0.713657
3.54942	0.6901
2.94308	0.62169
4.72048	0.671889
3.01196	0.637301
4.60336	0.676119
2.286	0.779378
4.77099	0.695761
5.21279	0.707176
1.68976	0.73212
3.06717	0.640857
2.22938	0.775595
3.0515	0.63493
2.78116	0.609389
4.12164	0.606622
4.52751	0.693412
4.43839	0.675138
3.34386	0.660112
3.09569	0.715305
4.45457	0.675603
2.16084	0.583631
4.91801	0.643594
2.06842	0.624762
3.87208	0.600416
5.31517	0.650432
3.98184	0.593435
2.62413	0.67494
3.42676	0.604415
3.32042	0.644624
2.42032	0.570694
2.23275	0.571147
2.52428	0.586202
2.86133	0.609712
5.19494	0.662647
2.82555	0.689966
2.46417	0.568075
3.79878	0.622398
2.11197	0.606843
3.07511	0.578608
4.19212	0.624143
4.71513	0.638638
2.46526	0.65187
1.98115	0.635497
5.25845	0.677452
3.04536	0.636511
2.34316	0.624078
2.0859	0.576882
3.22293	0.624477
3.62022	0.615586
2.69453	0.73183
3.8169	0.619239
3.04625	0.668942
4.168	0.667913
4.11811	0.633367
4.39392	0.613025
4.32585	0.612307
3.05147	0.61642
2.53962	0.656351
2.16323	0.631669
5.17024	0.702629
1.80681	0.679791
2.2438	0.704516
2.89277	0.691831
3.01653	0.71432
5.21718	0.676123
2.71608	0.504967
1.68541	0.699961
2.37573	0.661613
3.92303	0.647199
1.97632	0.701888
5.20972	0.679402
3.48047	0.607681
4.93563	0.680851
4.78604	0.677358
3.9121	0.678431
2.83428	0.657149
2.25314	0.652117
4.48496	0.680379
4.25393	0.673407
4.60278	0.75958
2.56077	0.62593
1.74711	0.70192
4.94588	0.67805
3.58155	0.723754
4.33763	0.647018
3.10171	0.748331
3.95745	0.640524
4.37188	0.74177
3.40777	0.676318
5.23929	0.687507
2.31149	0.74772
3.64567	0.578744
3.11798	0.595231
2.31725	0.598399
2.01871	0.737367
4.81323	0.681424
4.18258	0.602389
2.35826	0.601558
3.73873	0.652032
3.61043	0.677315
1.70389	0.677885
4.28947	0.623564
3.72374	0.71101
3.12907	0.657238
5.70696	0.719938
2.56805	0.744421
3.9983	0.711207
3.84133	0.658091
4.96308	0.712755
4.71201	0.690768
2.65374	0.618753
2.78403	0.670027
2.2895	0.766232
3.28682	0.677212
3.97357	0.632029
2.30572	0.735274
3.58898	0.630425
2.53569	0.649864
3.05499	0.676609
3.45204	0.667015
2.03449	0.698836
3.4927	0.622425
2.93494	0.62346
3.14775	0.693716
2.69952	0.690522
3.05326	0.700729
3.43891	0.65758
1.88639	0.682279
2.16268	0.543804
3.27303	0.662995
3.20561	0.711267
2.13041	0.626023
1.9338	0.672547
4.14935	0.639135
3.22383	0.661692
4.6028	0.661521
5.24947	0.688556
2.51989	0.682367
4.76543	0.660253
2.59591	0.541508
4.51103	0.670224
2.64067	0.65362
4.06963	0.702211
3.04102	0.632893
2.62143	0.613264
3.9626	0.756297
5.44492	0.741059
3.56828	0.696452
2.68816	0.668453
4.62842	0.693163
4.68405	0.692793
3.32821	0.677759
2.26552	0.656904
3.87262	0.640489
3.79812	0.668609
2.37036	0.702283
4.06703	0.622116
1.92108	0.636242
5.19032	0.741172
4.47351	0.632574
3.36174	0.69128
4.26008	0.705655
5.18362	0.709828
4.38853	0.669915
2.24539	0.736143
3.78544	0.74959
2.31796	0.603295
4.97114	0.707221
2.87629	0.69629
1.60113	0.736044
2.66476	0.736418
4.59119	0.655862
3.07411	0.667126
4.85127	0.697004
3.42026	0.708884
2.31265	0.611611
2.13165	0.719006
3.00488	0.633916
4.2225	0.704533
2.8069	0.652671
3.39995	0.678477
2.9871	0.716801
1.99615	0.62094
2.57736	0.648954
3.09913	0.708483
2.76772	0.756305
2.59795	0.601493
2.73578	0.620684
3.65734	0.646162
4.10999	0.704336
3.24277	0.651549
2.40413	0.70727
3.3542	0.689072
2.51459	0.62323
3.0689	0.673559
4.32225	0.648462
3.03399	0.674786
2.8371	0.751431
3.08449	0.750723
3.7266	0.727779
3.32709	0.662745
4.28325	0.689703
4.28077	0.681534
3.98161	0.659419
4.44079	0.72785
3.43735	0.62429
4.29505	0.669801
2.77445	0.621001
4.11905	0.653015
2.69951	0.760068
3.93586	0.682169
2.60409	0.7198
1.82466	0.664602
2.49011	0.724592
2.60307	0.75072
2.46539	0.738343
3.71945	0.668629
2.68368	0.750712
3.30863	0.651603
2.48047	0.572741
3.36093		0.597053
4.78871		0.676491
4.12596		0.720616
3.78616		0.574237
2.90105		0.662957
4.01434		0.557058
4.851		0.624814
3.77562		0.633093
4.49571		0.653624
2.55017		0.630296
4.77983		0.632956
3.72533		0.644255
2.38769		0.600257
3.89613		0.623295
4.26214		0.609549
4.94161		0.652437
3.83289		0.61837
3.80576		0.637527
5.43422		0.6629
2.04487		0.556964
1.89518		0.583864
3.80017		0.609395
2.14876		0.611889
4.15355		0.547099
3.20392		0.621984
3.44278		0.556328
2.37067		0.623019
3.21639		0.666552
3.90667		0.615238
2.43058		0.54792
3.64057		0.612219
4.7944		0.679445
4.59759		0.609024
2.92676		0.645514
2.8772		0.515096
2.55245		0.630858
2.41409		0.595499
3.19562		0.554578
4.67172		0.650404
2.98979		0.625341
3.41091		0.554076
3.44896		0.570078
3.92096		0.618388
4.28824		0.652859
3.00312		0.621431
2.51672		0.612727
2.38634		0.66879
3.15705		0.547401
3.09571		0.609982
2.82865		0.574931
3.05371		0.63486
4.18227		0.668518
2.99812		0.609258
3.17126		0.694497
2.74615		0.586776
2.60645		0.650286
3.00967		0.65852
2.02001		0.665506
3.33222		0.654721
3.57875		0.677716
3.17126		0.668464
4.29939		0.622621
3.30405		0.677431
2.80103		0.745949
3.12545		0.551199
4.12958		0.644078
1.57252		0.663096
3.82684		0.692426
3.2031		0.668312
3.42002		0.589125
3.391		0.574247
3.14419		0.606322
3.78403		0.596574
2.93692		0.753434
3.85257		0.585953
4.71653		0.673182
3.1545		0.564213
1.85219		0.738758
4.0519		0.68606
2.7484		0.612643
3.58601		0.671725
2.6143		0.630835
2.7309		0.678844
2.35713		0.650348
3.44044		0.65628
4.1061		0.670741
3.72016		0.597056
3.82466		0.589087
3.56141		0.607245
3.47741		0.644434
2.04362		0.716537
2.23653		0.595827
2.99867		0.634943
3.60231		0.601097
3.34386		0.555382
4.44439		0.646887
3.29976		0.663143
3.63982		0.674163
3.13247		0.596494
2.33671		0.586678
1.56335		0.619139
2.78519		0.657913
3.50639		0.634653
2.63219		0.645972
3.52226		0.638918
2.69699		0.708661
2.93384		0.565657
4.1053		0.66859
4.35036		0.631322
3.77422		0.659236
4.01831		0.640667
4.93838		0.672239
5.07789		0.638685
4.34608		0.631267
2.21811		0.518079
3.9711		0.623446
4.15163		0.603463
4.3148		0.659307
3.39319		0.618158
4.19872		0.682363
3.03618		0.620449
4.22772		0.619657
4.06563		0.614599
4.69572		0.633525
4.09623		0.630979
5.91598		0.664836
4.0156		0.614508
4.29507		0.600201
4.39681		0.624102
3.94601		0.655246
4.56969		0.661143
2.81354		0.597672
4.40528		0.610605
5.12885		0.64485
2.93766		0.610257
4.4318		0.588828
4.5551		0.657566
3.41403		0.558841
6.3065		0.712471
4.75648		0.661384
3.35422		0.61638
5.52004		0.677383
3.8358		0.565563
4.33396		0.629747
5.84806		0.701475
2.87071		0.619266
1.95844		0.566694
3.54944		0.565403
4.1294		0.590374
3.92164		0.595687
2.40413		0.718624
4.28698		0.674467
5.25401		0.661398
2.72211		0.647674
3.18475		0.627272
2.12289		0.697285
3.90051		0.666822
2.76194		0.615415
3.52835		0.639304
3.78053		0.632432
2.32643		0.666375
4.26768		0.680646
4.45158		0.687169
2.49118		0.686636
3.66025		0.574691
4.12745		0.677025
2.99245		0.679195
3.30218		0.617868
4.1035		0.653488
3.43036		0.597238
4.5545		0.702432
2.34808		0.659311
1.94067		0.749074
4.10739		0.674122
3.99897		0.658694
3.37242		0.573027
3.6943		0.53034
3.98763		0.639851
3.38109		0.548387
4.13647		0.585863
3.42181		0.62229
5.18358		0.664358
3.80371		0.607885
2.04492		0.711654
3.25097		0.537981
3.72874		0.614095
4.07745		0.574383
2.07723		0.524356
3.85656		0.597217
4.42758		0.617213
4.0683		0.590848
3.43424		0.503163
4.03477		0.580525
3.38582		0.643742
3.77277		0.593919
3.34147		0.666455
4.13325		0.679978
2.60716		0.640127
2.1466		0.576462
3.91414		0.610123
3.57662		0.6328
2.81606		0.620383
3.78537		0.628429
2.28138		0.647555
2.07875		0.711752
5.13897		0.689374
4.00931		0.638265
3.60644		0.684117
3.77261		0.599892
1.64441		0.523744
3.38352		0.606932
3.25774		0.549877
2.37904		0.635287
5.02625		0.691561
3.06813		0.622274
3.83805		0.607302
4.74569		0.674937
4.08735		0.657687
5.08766		0.69849
4.7867		0.661187
3.04624		0.693148
3.4979		0.599916
3.47718		0.623249
3.67046		0.644293
4.5043		0.636211
2.45566		0.719941
4.17431		0.602395
3.55319		0.677981
3.43426		0.729528
4.06242		0.645767
3.50488		0.665673
4.86992		0.665604
3.95276		0.607359
2.45999		0.675716
3.055		0.597895
3.18058		0.68928
2.52623		0.693214
3.98831		0.605851
3.04452		0.703678
3.72733		0.657106
4.57901		0.677068
2.38634		0.644819
4.00364		0.650361
2.82299		0.625144
4.31734		0.619881
5.30298		0.706138
3.05674		0.647469
2.65776		0.617191
2.31611		0.704662
4.27456		0.681141
3.65078		0.699734
5.31249		0.731762
4.76317		0.711337
3.81629		0.634081
3.58378		0.625109
3.71443		0.611561
5.20358		0.722071
2.68566		0.705416
2.51141		0.719835
3.37479		0.657073
2.58973		0.624326
4.80493		0.728383
2.23296		0.641145
3.45666		0.612236
3.85863		0.709076
3.08708		0.628637
5.0677		0.692261
2.8938		0.639824
3.97693		0.692396
4.60451		0.671331
1.61067		0.609253
1.76983		0.751199
2.56285		0.6412
4.47366		0.694111
5.45107		0.72586
3.4257		0.630712
4.48139		0.664769
3.70078		0.663961
2.40191		0.708416
4.14226		0.684826
3.03223		0.62202
1.96522		0.610219
2.47724		0.589857
2.46647		0.681066
2.88273		0.667714
3.98696		0.699529
3.49574		0.702
4.06044		0.693461
3.38582		0.624667
4.84357		0.692217
2.41408		0.668776
4.90206		0.679534
2.52833		0.640622
4.98129		0.688302
2.5753		0.611085
2.31955		0.585523
4.34315		0.681956
2.1254		0.614049
3.92705		0.687722
2.84928		0.683833
4.52986		0.714443
4.17652		0.754972
3.93758		0.739047
5.59251		0.722734
4.45256		0.677837
4.2676		0.678281
2.34089		0.679825
3.9001		0.716799
4.86746		0.683731
2.9351		0.696605
3.19893		0.686543
2.34886		0.72358
4.08537		0.651298
3.85534		0.688436
4.88443		0.707582
4.02876		0.633185
4.50977		0.653857
2.13317		0.743806
5.72325		0.703474
4.13475		0.717262
3.51399		0.7415
3.62619		0.618351
4.19502		0.695336
4.03605		0.670513
2.80007		0.704115
2.26905		0.614488
2.82665		0.648612
4.81838		0.682471
2.47831		0.59976
5.0442		0.653099
3.96866		0.663735
3.90353		0.643863
2.42493		0.592429
3.27482		0.661201
4.40129		0.695878
2.37036		0.576256
3.19391		0.730017
4.09255		0.633426
3.05808		0.705397
3.91241		0.655602
4.88498		0.685579
2.2843		0.682246
5.20316		0.709631
2.25607		0.659365
2.52104		0.6295
3.18386		0.706828
4.14636		0.643485
4.57094		0.690284
5.93895		0.721821
3.24122		0.590977
2.62345		0.744014
3.89778		0.645441
3.13757		0.733479
4.42818		0.660838
3.78405		0.651751
5.17123		0.690557
2.85395		0.82289
3.46128		0.600588
3.40621		0.629686
4.18957		0.691792
3.51322		0.701751
4.15125		0.662482
4.19656		0.72987
2.58252		0.712101
2.91032		0.679465
4.20417		0.661525
1.96251		0.697056
3.80651		0.739414
1.8421		0.73442
5.16917		0.697745
5.44569		0.713969
3.6178		0.66488
3.06108		0.720971
3.01108		0.659937
2.85861		0.6845
4.17301		0.653954
3.03223		0.676
3.35896		0.629844
4.03345		0.62501
3.31908		0.663961
2.53569		0.629283
4.0683		0.641458
2.33214		0.642931
2.35713		0.691694
4.75197		0.668447
2.26493		0.633972
4.86443		0.704219
3.59046		0.638392
3.20393		0.646603
3.68419		0.620445
3.26813		0.628921
4.53809		0.681498
3.27302		0.62122
2.43167		0.727549
4.93455		0.659641
4.49741		0.691921
3.77207		0.630359
2.19081		0.724609
3.95544		0.627623
3.8448		0.697863
2.72701		0.568725
4.2758		0.69065
3.17387		0.655124
4.34133		0.677147
2.92585		0.718948
4.97168		0.677192
3.65444		0.682251
4.08856		0.64844
2.78691		0.611038
2.38857		0.661438
2.77734		0.639021
4.44681		0.697176
3.15536		0.67402
4.57668		0.653681
4.09767		0.738528
2.59488		0.649861
4.03545		0.611174
2.28718		0.670394
3.98363		0.63694
2.3207		0.596436
3.06631		0.639413
3.24853		0.679221
2.93857		0.641666
2.4976		0.642464
2.10905		0.590583
4.96308		0.705655
5.01074		0.690244
4.16435		0.674597
4.78278		0.737524
3.0755		0.670272
3.72141		0.699461
1.99205		0.749118
3.95518		0.694134
5.38377		0.712111
3.24204		0.736815
4.95662		0.705422
3.81566		0.648648
2.65719		0.708582
4.79393		0.680248
3.80935		0.640836
2.26198		0.68294
2.52422		0.655085
3.9599		0.716065
3.86848		0.663126
5.63532		0.734251
5.59251		0.713657
5.96542		0.76819
2.08378		0.694823
5.12508		0.735915
2.56306		0.777829
3.97693		0.64153
2.69754		0.666071
4.04334		0.698955
3.93924		0.668415
4.05124		0.616513
1.77584		0.75776
4.89445		0.692294
3.13587		0.678829
3.29492		0.724094
2.87441		0.731824
4.70635		0.705623
5.26515		0.720595
3.3046		0.674125
2.36503		0.737974
3.2172		0.767558
3.28682		0.689321
2.89472		0.735221
5.10279		0.751419
3.54492		0.706732
4.25142		0.658912
5.38321		0.712231
1.44321		0.742618
3.90324		0.716243
3.63689		0.697345
2.36052		0.728303
4.80326		0.633407
5.75344		0.708333
4.90641		0.700055
4.20671		0.662842
6.00089		0.717122
2.33329		0.689295
4.97594		0.697896
2.94127		0.712502
5.97152		0.739645
3.29896		0.65064
4.86388		0.743443
3.9903		0.726571
4.40224		0.7309
3.68347		0.61537
5.61806		0.735659
5.41774		0.723303
5.7107		0.756123
4.34315		0.692027
4.77546		0.704152
2.45347		0.724465
3.11114		0.63459
2.33329		0.75039
4.52163		0.680294
5.04663		0.684971
3.01373		0.71555
right
control	Tnfrsf21 ΔEx2/ΔEx2
0.647899	0.627832
0.675442	0.630063
0.65138	0.658456
0.655475	0.676676
0.676859	0.690971

## Sheet: Appendix 1-figure3D
top
	control					Tnfrsf21 ΔEx2/ΔEx2
0-1	0.182927	0.064725	0	0.3861	0.535714	0.121581	0.149365	0.1321	0	0.142552
1-2	24.0854	20.6472	20.1503	22.6512	26.1905	26.5046	20.9858	24.0423	24.5524	19.6009
2-3	38.3537	36.8285	42.8962	38.4813	34.9405	36.8997	32.935	39.2999	34.5908	32.288
3-4	24.6951	24.4013	23.3607	21.0425	25.6548	24.924	25.0934	23.712	22.2506	25.0178
4-5	11.1585	12.6214	11.1339	12.9344	10.2976	10.8815	15.9821	10.6341	13.4271	15.8232
>5	1.52439	5.43689	2.45902	4.5045	2.38095	0.668693	4.85437	2.17966	5.17903	7.12758
bottom
	control					Tnfrsf21 ΔEx2/ΔEx2
0-1	0	0	0	0	0	0	0	0	0	0
1-2	1.92819	1.03245	4.03101	4.08432	4.09836	2.28519	2.41228	1.87166	2.63543	2.79503
2-3	20.2128	18.1416	19.0698	21.3439	21.5847	20.2011	16.9956	21.5241	28.2577	20.8074
3-4	26.8617	24.4838	27.4419	31.4888	27.8688	27.1481	22.6974	26.3369	21.6691	26.7081
4-5	22.4069	21.6814	23.4108	18.8406	19.8087	20.1097	20.7237	20.3209	18.5944	20.0311
5-6	14.2952	16.3717	15.1938	13.4387	15.0273	15.7221	15.5702	16.4439	14.0556	12.7329
6-7	11.9681	8.55457	8.99225	6.71937	10.3825	12.5229	14.364	11.23	9.22401	12.4224
>7	2.32713	9.73451	1.86047	4.08432	1.22951	2.01097	7.23684	2.27273	5.56369	4.50311
