# Supplementary material for: Death receptor 6 does not regulate axon degeneration and Schwann cell injury responses during Wallerian degeneration
Source: eLife. 2026 Mar 27;14:RP108389. doi: 10.7554/eLife.108389 (PMC13030889; doi:10.7554/eLife.108389)
Supplement: Figure 1—figure supplement 1—source data 1. [file elife-108389-fig1-figsupp1-data1.xlsx]

## Sheet: Fig. 1-figure supplement 1A
left
control	Tnfrsf21 ΔEx2-3/ΔEx2-3
49.9032	25.8277
117.317	111.822
119.77	93.4551
79.4014	182.881
133.608	207.544
right
control	Tnfrsf21 ΔEx2/ΔEx2
104.544	82.2285
157.997	109.55
51.4408	111.771
103.527	111.408
119.547	78.6446
62.9445	43.4656
	138.294

## Sheet: Fig. 1-figure supplement 1B
left
control	WldS het
127.085	271.881
120.168	274.898
86.81	198.228
43.871	212.54
122.066	219.737
middle
control	Phr1 aKO
106.614	132.426
121.53	252.842
71.8557	250.409
	277.622
right
control	Sarm1 -/-
86.949	265.225
97.4008	280.098
115.65	303.294
