# Supplementary material for: Death receptor 6 does not regulate axon degeneration and Schwann cell injury responses during Wallerian degeneration
Source: eLife. 2026 Mar 27;14:RP108389. doi: 10.7554/eLife.108389 (PMC13030889; doi:10.7554/eLife.108389)
Supplement: Figure 1—figure supplement 2—source data 1. [file elife-108389-fig1-figsupp2-data1.xlsx]

## Sheet: Fig 1-figure supplement 2B
control 0min	control 30min	Tnfrsf21 ΔEx2-3/ΔEx2-3 0min	Tnfrsf21 ΔEx2-3/ΔEx2-3 30min
0.480123	0.75892	0.591655	0.699492
0.556986	0.614065	0.621697	0.793117
0.646092	0.68588	0.563248	0.644951
0.39441	0.542204	0.453264	0.597262
0.552216	0.552344	0.464413	0.502996
0.496119	0.612548	0.540621	0.525229
0.524088	0.768588	0.738564	0.927532
0.628181	0.849144	0.752748	0.740828
0.667208	0.73942	0.696281	0.788671

## Sheet: Fig 1-figure supplement 2D
control 0min	control 30min	Tnfrsf21 ΔEx2/ΔEx2 0min	Tnfrsf21 ΔEx2/ΔEx2 30min
0.854303	1.06688	0.971106	1.11024
0.87986	0.953699	1.03024	1.25439
0.906501	1.09226	0.932734	1.06862
0.755373	1.23186	0.759617	0.975524
0.766527	1.03817	0.688077	1.03519
0.898984	0.849016
