# Supplementary material for: Death receptor 6 does not regulate axon degeneration and Schwann cell injury responses during Wallerian degeneration
Source: eLife. 2026 Mar 27;14:RP108389. doi: 10.7554/eLife.108389 (PMC13030889; doi:10.7554/eLife.108389)
Supplement: Figure 1—source data 1. [file elife-108389-fig1-data1.xlsx]

## Sheet: Fig. 1B
top
control	Tnfrsf21 ΔEx2-3/ΔEx2-3	Tnfrsf21 ΔEx2/ΔEx2
0.01234	0.00933	0.00425
0.01514	0.0052	0.01709
0.0052	0.0071	0.00675
	0.00571	0.00161
	0.02133	0.01675
	0.0052	0.00161
	0.0071	0.00486
	0.00571	0.00957
	0.00546	0.00177
	0.00669	0.00934
	0.00502	0.01935
	0.0011	0.00791
	0.00845	0.00947
	0.00463	0.00694
	0.0134	0.00961
	0.00265	0.0151
	0.00956	0.00176
	0.00612	0.00105
	0.00714
	0.00276
	0.00539
	0.00573
	0.00759
	0.00852
	0.00721
	0.00748
	0.00788
	0.0115
	0.00778
	0.00543
	0.00375
	0.00336
	0.00455
	0.00478
	0.00145
	0.01474
	0.00342
	0.01055
bottom
control	Tnfrsf21 ΔEx2-3/ΔEx2-3	Tnfrsf21 ΔEx2/ΔEx2	WldS het	Phr1aKO	SARM1 -/-
0.01234	0.00933	0.00425	81.3402	44.8502	73.0734
0.01514	0.0052	0.01709	58.0242	64.2093	64.389
0.0052	0.0071	0.00675	73.2045	68.1022	67.2204
	0.00571	0.00161
	0.02133	0.01675
	0.0052	0.00161
	0.0071	0.00486
	0.00571	0.00957
	0.00546	0.00177
	0.00669	0.00934
	0.00502	0.01935
	0.0011	0.00791
	0.00845	0.00947
	0.00463	0.00694
	0.0134	0.00961
	0.00265	0.0151
	0.00956	0.00176
	0.00612	0.00105
	0.00714
	0.00276
	0.00539
	0.00573
	0.00759
	0.00852
	0.00721
	0.00748
	0.00788
	0.0115
	0.00778
	0.00543
	0.00375
	0.00336
	0.00455
	0.00478
	0.00145
	0.01474
	0.00342
	0.01055
