# Supplementary material for: Death receptor 6 does not regulate axon degeneration and Schwann cell injury responses during Wallerian degeneration
Source: eLife. 2026 Mar 27;14:RP108389. doi: 10.7554/eLife.108389 (PMC13030889; doi:10.7554/eLife.108389)
Supplement: Figure 2—figure supplement 1—source data 1. [file elife-108389-fig2-figsupp1-data1.xlsx]

## Sheet: Fig. 2-figure supplement 1B
30h axotomy
control	Tnfrsf21 ΔEx2-3/ΔEx2-3
32.29	20.34
29.6	37.77
30.78	41.27
32.57	26.06
29.22	26.53
3d axotomy
control	Tnfrsf21 ΔEx2-3/ΔEx2-3
34.08	37.8
33.24	29.11
32.25	24.88
36.45	29.55
37.51	31.53
27.98	31.87

## Sheet: Fig. 2-figure supplement 1C
30h axotomy
control	Tnfrsf21 ΔEx2/ΔEx2
28.76	31.69
30.89	31.53
29.7	30.1
25.48	31.78
28.82	28.36
34.72	32.55
	33.69
3d axotomy
control	Tnfrsf21 ΔEx2/ΔEx2
30.9	31
29.19	30.44
27.02	29.16
31.46	32.19
29.92	31.19
