# Supplementary material for: Death receptor 6 does not regulate axon degeneration and Schwann cell injury responses during Wallerian degeneration
Source: eLife. 2026 Mar 27;14:RP108389. doi: 10.7554/eLife.108389 (PMC13030889; doi:10.7554/eLife.108389)
Supplement: Figure 2—source data 1. [file elife-108389-fig2-data1.xlsx]

## Sheet: Fig. 2B
control uncut	control 3d cut	Tnfrsf21 ΔEx2-3/ΔEx2-3 uncut	Tnfrsf21 ΔEx2-3/ΔEx2-3 3d cut
0.431034	40.2209	31.3304	50.8696
9.06373	43.4584	30.6159	50.9577
7.04926	25.211	0	36.7326
0.898324	32.332	7.85714	28.3182
1.185	47.3685	3.41077	23.5227
24.3259	40.8587	0.706468	21.3032
6.17188	52.1202	27.2724	39.0604
16.2253	44.6051	26.9166	58.849
		23.2628	40.6788

## Sheet: Fig. 2D
control uncut	control 30h cut	Tnfrsf21 ΔEx2/ΔEx2 uncut	Tnfrsf21 ΔEx2/ΔEx2 30h cut
0.984848	38.9826	0.340136	35.6191
23.306	42.7743	2.6559	43.4109
0.884956	22.193	5.82913	42.1717
0	22.0124	0	37.168
8.05386	35.9321	0.331126	27.507
	25.8714	5.03356	56.1625
		0.877193	11.0839
