# Supplementary material for: Death receptor 6 does not regulate axon degeneration and Schwann cell injury responses during Wallerian degeneration
Source: eLife. 2026 Mar 27;14:RP108389. doi: 10.7554/eLife.108389 (PMC13030889; doi:10.7554/eLife.108389)
Supplement: Figure 3—source data 1. [file elife-108389-fig3-data1.xlsx]

## Sheet: Fig. 3B
	Control						Tnfrsf21 ΔEx2-3/ΔEx2-3
	Embryo3 100724	Embryo1 103124	Embryo3 103124	Embryo4 103124	Embryo8 100724		Embryo1 100724	Embryo6 100724	Embryo7 100724	Embryo2 103124	Embryo7 103124
0	0.11849	0.167844	0.0787111	0.105789	0.0981833		0.120492	0.115375	0.1467	0.0951444	0.0938333
6	0.481978	0.5001	0.614956	0.254811	0.15915		0.679155	0.60945	0.595554	0.346167	0.482856
24	0.860156	0.840322	0.845267	0.667967	0.846127		0.911231	0.907238	0.920291	0.764178	0.844144

## Sheet: Fig. 3E
	Control (FCIV)													DR6 Cre
0	0.176133	0.236367	0.262	0.230933	0.233567	0.2038	0.0682	0.109133	0.1317	0.099133	0.079933	0.109267		0.1567	0.191167	0.128533	0.207167	0.2261	0.237533	0.1115	0.1506	0.161133	0.101067	0.245333	0.163833
6	0.233633	0.274567	0.253667	0.150333	0.129967	0.2768	0.201767	0.164633	0.1659	0.141267	0.131333	0.1229		0.204133	0.248933	0.2432	0.333	0.358933	0.341933	0.184	0.1554	0.2345	0.335067	0.216367	0.209767
24	0.8155	0.914033	0.765067	0.722633	0.755667	0.725167	0.587167	0.7796	0.823767	0.727967	0.671467	0.857933		0.760733	0.859467	0.7967	0.8202	0.799	0.8497	0.802767	0.771167	0.798233	0.799867	0.818567	0.6517
